# Supplementary material for: Functional Neuroimaging in Irritable Bowel Syndrome: A Systematic Review Highlights Common Brain Alterations With Functional Movement Disorders
Source: PubMed Central journal article supplement — J Neurogastroenterol Motil. 2022 Apr 30;28(2):185–203. doi: 10.5056/jnm21079 (PMC8978134; doi:10.5056/jnm21079), 2022-04-30
Supplement: jnm-28-2-185-supple.pdf [file jnm-28-2-185-supple.pdf]

**Supplementary Table.** Strings Inserted on PubMed to Conduct the Bibliographic Search (August 2020)

| String                                                  | Result |
|---------------------------------------------------------|--------|
| (irritable bowel syndrome) AND functional neuroimaging  | 97     |
| (irritable bowel syndrome) AND functional brain imaging | 196    |
| (spastic colon) AND functional neuroimaging             | 97     |
| (Spastic bowel) AND functional neuroimaging             | 2      |
| (mucous colitis) AND functional neuroimaging            | 97     |
| (nervous colon) AND functional neuroimaging             | 16     |
| (spastic colon) AND functional brain imaging            | 194    |
| (Spastic bowel) AND functional brain imaging            | 2      |
| (mucous colitis) AND functional brain imaging           | 196    |
| (nervous colon) AND functional brain imaging            | 14     |
